# Supplementary material
Source: ML conference proceedings conference paper supplement (https://openaccess.thecvf.com/content/CVPR2024/html/Li_MVBench_A_Comprehensive_CVPR_2024_paper.html)
Supplement: Supplementary file 1 [file Li_MVBench_A_Comprehensive_CVPR_2024_supplemental.pdf]

## A. Training Hyperparameters

The hyperparameters used in different stages of training are listed in Tab. 10. We adopt TSN [70] sampling for all the videos as previous methods [39, 40, 71]. For both Stage1 and Stage2, we employ large-scale image and video caption data, as outlined in the main manuscript. During Stage3, we make use of diverse instruction data and incorporate LoRA modules [24] into the LLM with a rank of 16, an alpha value of 32, and a dropout rate of 0.1. We apply flash attention [12] to expedite the training process.

| config                 | Stage1                        | Stage2 | Stage3 |
|------------------------|-------------------------------|--------|--------|
| input frame            | 4                             | 4      | 8      |
| input resolution       | 224                           | 224    | 224    |
| max text length        | 32                            | 32     | 512    |
| optimizer              | AdamW                         |        |        |
| optimizer momentum     | $\beta_1, \beta_2=0.9, 0.999$ |        |        |
| weight decay           | 0.02                          |        |        |
| learning rate schedule | cosine decay                  |        |        |
| learning rate          | 1e-4                          | 1e-4   | 2e-5   |
| batch size             | 2048                          | 512    | 128    |
| warmup epochs          | 1                             | 0.2    | 0.6    |
| total epochs           | 10                            | 1      | 3      |
| backbone drop path     |                               | 0      |        |
| QFormer drop path      |                               | 0.2    |        |
| QFormer dropout        | 0                             | 0.1    | 0.1    |
| QFormer token          | 32                            | 96     | 96     |
| flip augmentation      |                               | yes    |        |
| augmentation           | MultiScaleCrop [0.5, 1]       |        |        |

Table 10. Training Hyperparameters for different stages.

## B. More Ablations

We have carried out further ablation studies, the results of which are displayed in Tabs. 11, 13, 12, and 14.

**QFormer.** Considering the richer information of video, we further introduce extra random-initialized queries after Stage1. Tab. 11 shows that more queries in Stage2 and Stage3 is beneficial, leading us to adopt 64 queries by default. Furthermore, inserting instructions without a question effectively steers toward more accurate responses. We argue that overly long context (“*instruction + question*”) may be difficult for information extraction of QFormer.

| #Query  | Instruction | Question | Avg                        |
|---------|-------------|----------|----------------------------|
| 32 + 0  | ✓           | ✗        | 47.8                       |
| 32 + 32 | ✓           | ✗        | 50.6 $\uparrow 2.8$        |
| 32 + 64 | ✓           | ✗        | <b>51.1</b> $\uparrow 3.3$ |
| 32 + 96 | ✓           | ✗        | 50.7 $\uparrow 2.9$        |
| 32 + 64 | ✓           | ✓        | 50.8 $\uparrow 3.0$        |
| 32 + 64 | ✗           | ✗        | 50.5 $\uparrow 2.7$        |

Table 11. QFormer. Introducing more extra queries helps.

**Resolution & Frame.** Tab. 12 reveals that increasing resolution does not improve performance; however, aug-

menting the number of frames enhances outcomes. This suggests that our MVBenCh primarily relies on temporal understanding instead of spatial understanding capacity.

| Training   | Testing    | Avg                        |
|------------|------------|----------------------------|
| 8×224×224  | 8×224×224  | 50.6                       |
|            | 8×384×384  | 49.9 $\downarrow 0.7$      |
|            | 16×224×224 | <b>51.1</b> $\uparrow 0.5$ |
|            | 32×224×224 | <b>51.1</b> $\uparrow 0.5$ |
|            | 64×224×224 | 51.0 $\uparrow 0.4$        |
| 16×224×224 | 16×224×224 | 51.0 $\uparrow 0.4$        |

Table 12. Resolution & Frame. Large resolution is harmful, while more frames are better for MVBenCh.

**Instruction data.** Note that there is a minimal source gap between our instruction data and MVBenCh. Specifically, the CLEVRER [88] in our instruction data has similar questions as *Moving Attribute* and *Counterfactual Inference* in MVBenCh, leading the evaluation is not strictly out-domain. And the videos of *Action Antonym* are from SthSthV2 [21], while the antonym is from PAXION [74]. We try to remove CLEVRER and SthSthV2 in the instruction data to evaluate their impact. The results outlined in Tab. 13 suggest a more pronounced influence from CLEVRER data, while SthSthV2 data appears to have less effect.

| Data                | Avg                   |
|---------------------|-----------------------|
| ALL                 | <b>51.1</b>           |
| ALL – CLEVRER [88]  | 49.3 $\downarrow 1.8$ |
| ALL – SthSthV2 [21] | 51.0 $\downarrow 0.1$ |

Table 13. Instruction Data.

**Question prompt.** During our experiments, we observed that various MLLMs often provide options along with detailed explanations. To circumvent this, we intentionally craft our question prompts to prevent such detailed outputs. Additionally, drawing inspiration from the Chain-of-Thought [76], we introduce the phrase “Let’s think step by step” into our prompts to direct the MLLMs’ reasoning process. However, as indicated by the results in Tab. 14, these tactics appear to have negative consequences.

| Question Prompt                                             | Avg                   |
|-------------------------------------------------------------|-----------------------|
| <i>Only give the best option.</i>                           | <b>51.1</b>           |
| <i>Only give the best option without any explanation.</i>   | 50.9 $\downarrow 0.2$ |
| <i>Let’s think step by step. Only give the best option.</i> | 50.5 $\downarrow 0.6$ |

Table 14. Question prompt.

## C. Details of QA Generation

In Tab. 15, we present a detailed description of our data generation methodology for MVBenCh. We have designed various strategies based on different data to increase task difficulty and enhance data diversity. For those datasets

| Task                     | Source               | Domain                                                       | Data Filtration                                                                                                                                                                                              | QA Generation                                                                                                               |
|--------------------------|----------------------|--------------------------------------------------------------|--------------------------------------------------------------------------------------------------------------------------------------------------------------------------------------------------------------|-----------------------------------------------------------------------------------------------------------------------------|
| Action Sequence          | STAR [77]            | · Real-world<br>· Indoor<br>· Third-person                   | ✓ Duration $\in (5, 22)$<br>✓ Data $\in$ Prediction<br>✗ $len(A) = 1 \vee A.split(" ") = "the"$                                                                                                              | QA: Directly adopt                                                                                                          |
| Action Antonym           | PAXION [74]          | · Real-world&Simulated<br>· Indoor&Outdoor<br>· Third-person | N/A                                                                                                                                                                                                          | Q: ChatGPT generates<br>A: GT+Antonym+"not sure"                                                                            |
| Fine-grained Action      | MiT V1 [52]          | · Real-world&Simulated<br>· Indoor&Outdoor<br>· Third-person | N/A                                                                                                                                                                                                          | Q: ChatGPT generates<br>A: Randomly sample 4 actions from top-6 predictions of UMT-L/16 [40]                                |
| Unexpected Action        | FunQA [80]           | · Real-world<br>· Indoor&Outdoor<br>· Third-person           | ✓ $len(QA \in H2) = 34, len(QA \in H3) = 33$<br>✓ $len(QA \in C2) = 33, len(QA \in C3) = 33$<br>✓ $len(QA \in M2) = 34, len(QA \in M3) = 33$                                                                 | QA: ChatGPT generates from original QA                                                                                      |
| Object Existence         | CLEVRER [88]         | · Simulated<br>· Indoor                                      | ✓ Data $\in$ descriptive $\wedge$ Data $\in$ exist<br>✓ $len(program) < 11$                                                                                                                                  | Q: ChatGPT generates<br>A: "yes"+"no"+"not sure"                                                                            |
| Object Interaction       | STAR [77]            | · Real-world<br>· Indoor<br>· Third-person                   | ✓ Duration $\in (7, 20)$<br>✓ Data $\in$ Interaction<br>✓ "object" in Q $\vee$ "to the" in Q                                                                                                                 | QA: Directly adopt                                                                                                          |
| Object Shuffle           | Perception Test [56] | · Real-world<br>· Indoor<br>· First&Third-person             | ✓ Data $\in$ object permanence<br>✓ "Where is the" in Q                                                                                                                                                      | QA: Directly adopt                                                                                                          |
| Moving Direction         | CLEVRER [88]         | · Simulated<br>· Indoor                                      | Select videos where a certain object is either stationary or moving in a single direction                                                                                                                    | Q: ChatGPT generates<br>A:  + "stationary" |
| Action Localization      | Charades-STA [19]    | · Real-world<br>· Indoor<br>· Third-person                   | ✓ Duration <sub>entire</sub> > 15<br>✓ Duration <sub>start,end,middle</sub> $\in (5, 8)$<br>✗ "person they" in Q $\vee$ "person. so they" in Q                                                               | Q: ChatGPT generates<br>A: "start"+"end"+"middle"+"entire"                                                                  |
| Scene Transition         | MoVQA [95]           | · Real-world<br>· Indoor&Outdoor<br>· Third-person           | Select videos with continuous scene labels                                                                                                                                                                   | QA: ChatGPT generates from original QA                                                                                      |
| Action Count             | Perception Test [56] | · Real-world<br>· Indoor<br>· First&Third-person             | ✓ Data $\in$ action counting                                                                                                                                                                                 | QA: Directly adopt                                                                                                          |
| Moving Count             | CLEVRER [88]         | · Simulated<br>· Indoor                                      | ✓ Data $\in$ descriptive $\wedge$ Data $\in$ count<br>✓ $len(program) < 9$                                                                                                                                   | Q: ChatGPT generates<br>A: Randomly shift original answer                                                                   |
| Moving Attribute         | CLEVRER [88]         | · Simulated<br>· Indoor                                      | ✓ Data $\in$ descriptive $\wedge$ Data $\in$ query_color<br>✓ Data $\in$ descriptive $\wedge$ Data $\in$ query_shape<br>✓ Data $\in$ descriptive $\wedge$ Data $\in$ query_material<br>✓ $len(program) < 13$ | Q: ChatGPT generates<br>A: Randomly select from candidates                                                                  |
| State Change             | Perception Test [56] | · Real-world<br>· Indoor<br>· First&Third-person             | ✓ Data $\in$ state recognition<br>✗ Q requires audio                                                                                                                                                         | QA: Directly adopt                                                                                                          |
| Fine-grained Pose        | NTU RGB+D [45]       | · Real-world<br>· Indoor<br>· Third-person                   | Select videos with specific poses                                                                                                                                                                            | Q: ChatGPT generates<br>A: Randomly select from similar poses                                                               |
| Character Order          | Perception Test [56] | · Real-world<br>· Indoor<br>· First&Third-person             | ✓ Data $\in$ letter<br>✓ "order" $\in$ Q                                                                                                                                                                     | QA: Directly adopt                                                                                                          |
| Egocentric Navigation    | VLN-CE [30]          | · Simulated<br>· Indoor<br>· First-person                    | ✓ moving forward > 0.75m<br>✓ turning left/right $\in (60^\circ, 120^\circ)$<br>then moving forward > 0.75m<br>✓ stop                                                                                        | Q: ChatGPT generates<br>A: "move forward"+"stop"<br>"turn left and move forward"+<br>"turn right and move forward"          |
| Episodic Reasoning       | TVQA [33]            | · Real-world<br>· Indoor&Outdoor<br>· Third-person           | ✓ Duration $\in (25, 40)$                                                                                                                                                                                    | QA: Directly adopt w/o subtitles                                                                                            |
| Counterfactual Inference | CLEVRER [88]         | · Simulated<br>· Indoor                                      | ✓ Data $\in$ counterfactual<br>✓ $len(program) < 8$                                                                                                                                                          | QA: Directly adopt                                                                                                          |

Table 15. More details about MVBench generation.

requiring question generation, we utilize ChatGPT [53] to generate 3 to 5 questions based on the task definitions.

## D. Results on Challenging Video QA

In Tabs. 17 and 18, we extend the evaluation of our VideoChat2 to other challenging video benchmarks *i.e.*, NEXt-QA [79], STAR [77] and TVQA [33]. Different from

the previous methods [89], which provide answers by comparing the likelihood of different options, we output the options directly, following the protocol of MVBench. Our results indicate that VideoChat2 not only holds its own against current SOTA methods [72, 89] on NEXt-QA but also markedly outperforms them on STAR and TVQA. This underscores the effectiveness and robustness of VideoChat2.

| Model                                                                                                                                       | LLM       | Avg         | AS          | AP          | AA          | FA          | UA          | OE          | OI          | OS          | MD          | AL          | ST           | AC          | MC          | MA          | SC          | FP          | CO          | EN          | ER          | CI          |
|---------------------------------------------------------------------------------------------------------------------------------------------|-----------|-------------|-------------|-------------|-------------|-------------|-------------|-------------|-------------|-------------|-------------|-------------|--------------|-------------|-------------|-------------|-------------|-------------|-------------|-------------|-------------|-------------|
| Random                                                                                                                                      | -         | 27.3        | 25.0        | 25.0        | 33.3        | 25.0        | 25.0        | 33.3        | 25.0        | 33.3        | 25.0        | 25.0        | 25.0         | 33.3        | 25.0        | 33.3        | 33.3        | 25.0        | 33.3        | 25.0        | 20.0        | 30.9        |
| <i>GPT-4V take 16 frames as input, and the resolution is 512×512, while others use small resolution of 224×224.</i>                         |           |             |             |             |             |             |             |             |             |             |             |             |              |             |             |             |             |             |             |             |             |             |
| GPT-4V [54]                                                                                                                                 | GPT-4     | 49.5        | <b>80.0</b> | 40.0        | 30.0        | 50.0        | <b>60.0</b> | 60.0        | <b>90.0</b> | 40.0        | 20.0        | <b>60.0</b> | <b>100.0</b> | 40.0        | 20.0        | <b>50.0</b> | 40.0        | <b>70.0</b> | <b>50.0</b> | 20.0        | <b>60.0</b> | 10.0        |
| <i>Image MLLMs: Following [11], all models take 4 frames as input, with the output embeddings concatenated before feeding into the LLM.</i> |           |             |             |             |             |             |             |             |             |             |             |             |              |             |             |             |             |             |             |             |             |             |
| Otter-I [36]                                                                                                                                | MPT-7B    | 35.0        | 50.0        | 30.0        | 20.0        | 30.0        | 40.0        | 50.0        | 50.0        | 30.0        | 30.0        | 10.0        | 40.0         | 40.0        | 20.0        | 40.0        | 40.0        | 40.0        | 30.0        | 30.0        | 40.0        | 40.0        |
| InstructBLIP [11]                                                                                                                           | Vicuna-7B | 34.0        | 40.0        | 50.0        | 40.0        | 40.0        | 40.0        | 60.0        | 40.0        | 10.0        | 20.0        | 20.0        | 70.0         | 30.0        | 20.0        | 30.0        | 50.0        | 40.0        | 20.0        | 20.0        | 30.0        | 10.0        |
| LLaVA [44]                                                                                                                                  | Vicuna-7B | 34.5        | 40.0        | 30.0        | 20.0        | 30.0        | <b>60.0</b> | 50.0        | 30.0        | 20.0        | 30.0        | 30.0        | 40.0         | 20.0        | <b>40.0</b> | 30.0        | 40.0        | 30.0        | 40.0        | 20.0        | 50.0        | 40.0        |
| <i>Video MLLMs: All models take 16 frames as input, with the exception of VideoChatGPT, which uses 100 frames.</i>                          |           |             |             |             |             |             |             |             |             |             |             |             |              |             |             |             |             |             |             |             |             |             |
| VideoChatGPT [48]                                                                                                                           | Vicuna-7B | 32.5        | 30.0        | 30.0        | 50.0        | 30.0        | 40.0        | 70.0        | 20.0        | <b>50.0</b> | 10.0        | 20.0        | 10.0         | 30.0        | 10.0        | 30.0        | <b>70.0</b> | 20.0        | <b>50.0</b> | 10.0        | 50.0        | 20.0        |
| VideoLLaMA [94]                                                                                                                             | Vicuna-7B | 34.0        | 30.0        | 20.0        | 50.0        | 40.0        | 20.0        | 50.0        | 40.0        | 0.0         | 30.0        | 10.0        | 70.0         | 40.0        | 30.0        | 30.0        | 50.0        | 30.0        | <b>50.0</b> | 50.0        | 40.0        | 0.0         |
| VideoChat [39]                                                                                                                              | Vicuna-7B | 36.5        | 50.0        | 10.0        | 50.0        | 20.0        | 50.0        | 60.0        | 70.0        | 40.0        | <b>40.0</b> | 40.0        | 50.0         | 30.0        | 20.0        | 40.0        | 50.0        | 20.0        | 30.0        | 10.0        | 50.0        | 0.0         |
| <b>VideoChat2<sub>text</sub></b>                                                                                                            | Vicuna-7B | 35.0        | 40.0        | 40.0        | 30.0        | 30.0        | 30.0        | 40.0        | 20.0        | <b>50.0</b> | 20.0        | 30.0        | 60.0         | <b>60.0</b> | 30.0        | 20.0        | 60.0        | 20.0        | <b>50.0</b> | 30.0        | 30.0        | 10.0        |
| <b>VideoChat2</b>                                                                                                                           | Vicuna-7B | <b>56.5</b> | 60.0        | <b>60.0</b> | <b>90.0</b> | <b>60.0</b> | <b>60.0</b> | <b>70.0</b> | 80.0        | 30.0        | 20.0        | 40.0        | <b>100.0</b> | 40.0        | <b>40.0</b> | 40.0        | 60.0        | 50.0        | 40.0        | <b>60.0</b> | <b>60.0</b> | <b>70.0</b> |

Table 16. **Evaluations results on MVBench subset.** We randomly sample 10 multiple-choice QAs for each task due to time constraints. The results on full MVBench can be found at [https://huggingface.co/spaces/OpenGVLab/MVBench\\_Leaderboard](https://huggingface.co/spaces/OpenGVLab/MVBench_Leaderboard).

| Model            | Zero-shot   |             |             |             | Fine-tuning |             |             |             |
|------------------|-------------|-------------|-------------|-------------|-------------|-------------|-------------|-------------|
|                  | Tem.        | Cau.        | Des.        | Avg         | Tem.        | Cau.        | Des.        | Avg         |
| All-in-One [69]  | -           | -           | -           | -           | 48.6        | 48.0        | 63.2        | 50.6        |
| MIST [18]        | -           | -           | -           | -           | 56.6        | 54.6        | 66.9        | 57.1        |
| HiTeA [86]       | -           | -           | -           | -           | 58.3        | 62.4        | 75.6        | 63.1        |
| InternVideo [73] | 43.4        | 48.0        | 65.1        | 59.1        | 58.3        | 62.4        | 75.6        | 63.1        |
| SEVILA [89]      | 61.3        | 61.5        | 75.6        | 63.6        | 69.4        | 74.2        | 81.3        | 73.8        |
| VideoChat2       | <b>57.4</b> | <b>61.9</b> | <b>69.9</b> | <b>61.7</b> | <b>64.7</b> | <b>68.7</b> | <b>76.1</b> | <b>68.6</b> |

Table 17. **Results on NExT-QA [79].** “Tem.”, “Cau.” and “Des.” stand for “Temporal”, “Causal” and “Descriptive” respectively. SEVILA [89] is de-emphasized since it needs to train an additional localizer. For zero-shot results, we simply remove the NExT-QA in our instruction data.

## E. Comparisons with GPT-4V

We further conduct evaluations for GPT-4V [54] in Tab. 16. Given the time constraints, we randomly sample 10 multiple-choice QAs for each task. The results indicate that GPT-4V [54] achieved satisfactory performance on our MVBench, demonstrating its considerable capacity for temporal understanding. Notably, our VideoChat2 outperforms it by increasing accuracy by 7%,

## F. Leaderboards and Analyses

To facilitate a clear comparison of different open-sourced MLLMs, we present the leaderboards for different tasks on MVBench in Tab. 19. Overall, our VideoChat2 achieves the highest rank across 15 tasks.

**Action & Pose.** For tasks associated with action and pose (a)(b)(c)(d)(e)(p), our VideoChat2 and VideoChat [39] tends to outperform VideoChatGPT [48], underscoring the significance of elaborate video backbones [38, 40] for effective action and pose recognition.

**Object & Attribute.** In object-related tasks (f)(g)(h), the performance of image MLLM, *i.e.* LLaVA [44], compares favorably with our VideoChat2. It could be attributed to its potent attribute recognition capabilities, as illustrated in (n). Note that VideoChatGPT [48] is tuned from LLaVA,

| Model            | STAR        |             |             |             |             | TVQA        |
|------------------|-------------|-------------|-------------|-------------|-------------|-------------|
|                  | Int.        | Seq.        | Pre.        | Fea.        | Avg         |             |
| FrozenBiLM [85]  | -           | -           | -           | -           | -           | 29.7        |
| InternVideo [73] | 43.8        | 43.2        | 42.3        | 37.4        | 41.6        | 35.9        |
| SEVILA [89]      | 48.3        | 45.0        | 44.4        | 40.8        | 44.6        | 38.2        |
| VideoChat2       | <b>58.4</b> | <b>60.9</b> | <b>55.3</b> | <b>53.1</b> | <b>59.0</b> | <b>40.6</b> |

Table 18. **Zero-shot results on STAR [77] and TVQA [33].** “Int.”, “Seq.”, “Pre.” and “Fea.” stand for “Interaction”, “Sequence”, “Prediction” and “Feasibility” respectively. SEVILA [89] is de-emphasized since it needs to train an additional localizer. For TVQA, we do not input subtitles.

thus achieving similar results on these tasks.

**Position & Count & Character.** In position-related tasks (i)(j), none of the models achieve satisfactory results, their performances being analogous to random guessing. For counting and character-related tasks (l)(q), our VideoChat2 performs similarly and even worse than VideoChat2<sub>text</sub> without videos (as in Tab. 2). We hypothesize that current MLLMs have difficulty generalizing to localization and counting tasks in the absence of related tuning data. Some recent studies [2, 8, 9] incorporate grounding data and tune the LLM to enhance localizing and discriminating abilities. In our future work, we will explore improvements in VideoChat2’s grounding ability.

**Scene.** As presented in Tab. 19(k), our VideoChat2 excels at scene transition tasks, significantly outperforming other models. This showcases its sensitivity to background changes, making it effective in recognizing camera movements as shown in Fig. 7.

**Cognition.** In cognition tasks (r)(s)(t), our VideoChat2 encounters difficulties with complex egocentric navigation and episode reasoning. Given the results from FrozenBiLM [85], where the performance for TVQA reasoning significantly improves with the incorporation of speech subtitles, we suggest that visual information alone may not be sufficient. The inclusion of other modalities, such as depth and audio, could prove beneficial.

| Rank | Model           | Acc  |
|------|-----------------|------|------|-----------------|------|------|-----------------|------|------|-----------------|------|
| 1    | 🏠 VideoChat2    | 66.0 | 1    | 🏠 VideoChat2    | 47.5 | 1    | 🏠 VideoChat2    | 83.5 | 1    | 🏠 VideoChat2    | 49.5 |
| 2    | 🏠 Otter-I       | 34.5 | 2    | 🏠 LLaVA         | 39.5 | 2    | 🏠 LLaVA         | 63.0 | 2    | 🏠 VideoChat     | 33.5 |
| 3    | 🏠 VideoChat     | 33.5 | 3    | 🏠 Otter-I       | 32.0 | 3    | 🏠 VideoChatGPT  | 62.0 | 3    | 🏠 Otter-I       | 30.5 |
| 4    | 🏠 LLaVA         | 28.0 | 4    | 🏠 BLIP2         | 29.0 | 4    | 🏠 VideoChat     | 56.0 | 4    | 🏠 LLaVA         | 30.5 |
| 5    | 🏠 VideoLLaMA    | 27.5 | 5    | 🏠 LLaMA-Adapter | 28.0 | 5    | 🏠 LLaMA-Adapter | 51.0 | 5    | 🏠 LLaMA-Adapter | 30.0 |
| 6    | 🏠 mPLUG-Owl-I   | 25.0 | 6    | 🏠 VideoChat     | 26.5 | 6    | 🏠 VideoLLaMA    | 51.0 | 6    | 🏠 VideoLLaMA    | 29.0 |
| 7    | 🏠 BLIP2         | 24.5 | 7    | 🏠 VideoChatGPT  | 26.0 | 7    | 🏠 InstructBLIP  | 46.0 | 7    | 🏠 mPLUG-Owl-I   | 27.0 |
| 8    | 🏠 VideoChatGPT  | 23.5 | 8    | 🏠 VideoLLaMA    | 25.5 | 8    | 🏠 mPLUG-Owl-I   | 44.5 | 8    | 🏠 InstructBLIP  | 24.5 |
| 9    | 🏠 LLaMA-Adapter | 23.0 | 9    | 🏠 mPLUG-Owl-I   | 20.0 | 9    | 🏠 Otter-I       | 39.5 | 9    | 🏠 VideoChatGPT  | 22.5 |
| 10   | 🏠 InstructBLIP  | 20.0 | 10   | 🏠 MiniGPT-4     | 18.0 | 10   | 🏠 BLIP2         | 33.5 | 10   | 🏠 MiniGPT-4     | 21.5 |
| 11   | 🏠 MiniGPT-4     | 16.0 | 11   | 🏠 InstructBLIP  | 16.5 | 11   | 🏠 MiniGPT-4     | 26.0 | 11   | 🏠 BLIP2         | 17.0 |

(a) Action Sequence

| Rank | Model           | Acc  |
|------|-----------------|------|------|-----------------|------|------|-----------------|------|------|-----------------|------|
| 1    | 🏠 VideoChat2    | 60.0 | 1    | 🏠 VideoChat2    | 58.0 | 1    | 🏠 VideoChat2    | 71.5 | 1    | 🏠 VideoChat2    | 42.5 |
| 2    | 🏠 InstructBLIP  | 46.0 | 2    | 🏠 VideoChatGPT  | 54.0 | 2    | 🏠 Otter-I       | 44.0 | 2    | 🏠 LLaVA         | 41.5 |
| 3    | 🏠 BLIP2         | 42.0 | 3    | 🏠 LLaMA-Adapter | 53.5 | 3    | 🏠 LLaVA         | 41.0 | 3    | 🏠 VideoChatGPT  | 40.0 |
| 4    | 🏠 VideoChat     | 40.5 | 4    | 🏠 LLaVA         | 53.0 | 4    | 🏠 VideoLLaMA    | 40.5 | 4    | 🏠 VideoLLaMA    | 38.0 |
| 5    | 🏠 LLaVA         | 39.0 | 5    | 🏠 VideoChat     | 53.0 | 5    | 🏠 VideoChat     | 40.5 | 5    | 🏠 InstructBLIP  | 37.5 |
| 6    | 🏠 VideoLLaMA    | 39.0 | 6    | 🏠 BLIP2         | 51.5 | 6    | 🏠 LLaMA-Adapter | 32.5 | 6    | 🏠 mPLUG-Owl-I   | 34.0 |
| 7    | 🏠 Otter-I       | 38.5 | 7    | 🏠 InstructBLIP  | 51.0 | 7    | 🏠 VideoChatGPT  | 28.0 | 7    | 🏠 LLaMA-Adapter | 33.5 |
| 8    | 🏠 LLaMA-Adapter | 33.0 | 8    | 🏠 Otter-I       | 48.5 | 8    | 🏠 BLIP2         | 26.0 | 8    | 🏠 BLIP2         | 31.0 |
| 9    | 🏠 VideoChatGPT  | 26.5 | 9    | 🏠 VideoLLaMA    | 48.0 | 9    | 🏠 InstructBLIP  | 26.0 | 9    | 🏠 VideoChat     | 30.0 |
| 10   | 🏠 mPLUG-Owl-I   | 23.5 | 10   | 🏠 mPLUG-Owl-I   | 36.0 | 10   | 🏠 MiniGPT-4     | 25.5 | 10   | 🏠 Otter-I       | 29.5 |
| 11   | 🏠 MiniGPT-4     | 16.0 | 11   | 🏠 MiniGPT-4     | 29.5 | 11   | 🏠 mPLUG-Owl-I   | 24.0 | 11   | 🏠 MiniGPT-4     | 13.0 |

(b) Action Prediction

| Rank | Model           | Acc  |
|------|-----------------|------|------|-----------------|------|------|-----------------|------|------|-----------------|------|
| 1    | 🏠 LLaMA-Adapter | 25.5 | 1    | 🏠 VideoChat     | 27.0 | 1    | 🏠 VideoChat2    | 88.5 | 1    | 🏠 InstructBLIP  | 42.5 |
| 2    | 🏠 BLIP2         | 25.5 | 2    | 🏠 BLIP2         | 26.0 | 2    | 🏠 Otter-I       | 55.0 | 2    | 🏠 VideoChat2    | 39.0 |
| 3    | 🏠 VideoChat     | 25.5 | 3    | 🏠 Otter-I       | 25.5 | 3    | 🏠 VideoChat     | 48.5 | 3    | 🏠 VideoChat     | 35.0 |
| 4    | 🏠 VideoChat2    | 23.0 | 4    | 🏠 mPLUG-Owl-I   | 24.0 | 4    | 🏠 InstructBLIP  | 46.5 | 4    | 🏠 mPLUG-Owl-I   | 34.5 |
| 5    | 🏠 VideoChatGPT  | 23.0 | 5    | 🏠 VideoChat2    | 23.0 | 5    | 🏠 LLaVA         | 45.0 | 5    | 🏠 LLaVA         | 34.0 |
| 6    | 🏠 mPLUG-Owl-I   | 23.0 | 6    | 🏠 InstructBLIP  | 23.0 | 6    | 🏠 VideoLLaMA    | 43.0 | 6    | 🏠 VideoLLaMA    | 34.0 |
| 7    | 🏠 LLaVA         | 23.0 | 7    | 🏠 VideoLLaMA    | 22.5 | 7    | 🏠 mPLUG-Owl-I   | 34.5 | 7    | 🏠 MiniGPT-4     | 32.5 |
| 8    | 🏠 VideoLLaMA    | 22.5 | 8    | 🏠 LLaMA-Adapter | 21.5 | 8    | 🏠 BLIP2         | 32.5 | 8    | 🏠 VideoChatGPT  | 30.5 |
| 9    | 🏠 InstructBLIP  | 22.0 | 9    | 🏠 LLaVA         | 20.5 | 9    | 🏠 VideoChatGPT  | 31.0 | 9    | 🏠 LLaMA-Adapter | 29.0 |
| 10   | 🏠 Otter-I       | 19.0 | 10   | 🏠 VideoChatGPT  | 20.0 | 10   | 🏠 LLaMA-Adapter | 30.5 | 10   | 🏠 BLIP2         | 25.5 |
| 11   | 🏠 MiniGPT-4     | 11.5 | 11   | 🏠 MiniGPT-4     | 12.0 | 11   | 🏠 MiniGPT-4     | 9.5  | 11   | 🏠 Otter-I       | 20.0 |

(c) Action Antonym

| Rank | Model           | Acc  |
|------|-----------------|------|------|-----------------|------|------|-----------------|------|------|-----------------|------|
| 1    | 🏠 VideoChat2    | 49.5 | 1    | 🏠 VideoChatGPT  | 48.5 | 1    | 🏠 VideoChat2    | 49.0 | 1    | 🏠 VideoChat2    | 58.5 |
| 2    | 🏠 VideoChat     | 33.5 | 2    | 🏠 LLaVA         | 47.0 | 2    | 🏠 VideoLLaMA    | 32.5 | 2    | 🏠 VideoChat     | 42.5 |
| 3    | 🏠 Otter-I       | 30.5 | 3    | 🏠 VideoChat     | 46.0 | 3    | 🏠 VideoChatGPT  | 29.0 | 3    | 🏠 LLaMA-Adapter | 41.5 |
| 4    | 🏠 LLaVA         | 30.5 | 4    | 🏠 VideoLLaMA    | 45.5 | 4    | 🏠 Otter-I       | 28.0 | 4    | 🏠 InstructBLIP  | 40.5 |
| 5    | 🏠 LLaMA-Adapter | 30.0 | 5    | 🏠 VideoChat2    | 44.0 | 5    | 🏠 BLIP2         | 27.0 | 5    | 🏠 BLIP2         | 40.0 |
| 6    | 🏠 VideoLLaMA    | 29.0 | 6    | 🏠 BLIP2         | 42.0 | 6    | 🏠 VideoChat     | 26.5 | 6    | 🏠 VideoChatGPT  | 39.5 |
| 7    | 🏠 mPLUG-Owl-I   | 27.0 | 7    | 🏠 mPLUG-Owl-I   | 40.0 | 7    | 🏠 MiniGPT-4     | 26.0 | 7    | 🏠 LLaVA         | 38.5 |
| 8    | 🏠 InstructBLIP  | 24.5 | 8    | 🏠 LLaMA-Adapter | 39.5 | 8    | 🏠 InstructBLIP  | 25.5 | 8    | 🏠 VideoLLaMA    | 32.5 |
| 9    | 🏠 VideoChatGPT  | 22.5 | 9    | 🏠 Otter-I       | 39.0 | 9    | 🏠 LLaMA-Adapter | 25.0 | 9    | 🏠 mPLUG-Owl-I   | 31.5 |
| 10   | 🏠 MiniGPT-4     | 21.5 | 10   | 🏠 MiniGPT-4     | 34.0 | 10   | 🏠 LLaVA         | 25.0 | 10   | 🏠 Otter-I       | 28.5 |
| 11   | 🏠 BLIP2         | 17.0 | 11   | 🏠 InstructBLIP  | 32.0 | 11   | 🏠 mPLUG-Owl-I   | 24.0 | 11   | 🏠 MiniGPT-4     | 8.0  |

(d) Fine-grained Action

| Rank | Model           | Acc  |
|------|-----------------|------|------|-----------------|------|------|-----------------|------|------|-----------------|------|
| 1    | 🏠 VideoChat2    | 60.0 | 1    | 🏠 VideoChat     | 27.0 | 1    | 🏠 VideoChat2    | 88.5 | 1    | 🏠 InstructBLIP  | 42.5 |
| 2    | 🏠 InstructBLIP  | 46.0 | 2    | 🏠 BLIP2         | 26.0 | 2    | 🏠 Otter-I       | 55.0 | 2    | 🏠 VideoChat2    | 39.0 |
| 3    | 🏠 BLIP2         | 42.0 | 3    | 🏠 Otter-I       | 25.5 | 3    | 🏠 VideoChat     | 48.5 | 3    | 🏠 VideoChat     | 35.0 |
| 4    | 🏠 VideoChat     | 40.5 | 4    | 🏠 mPLUG-Owl-I   | 24.0 | 4    | 🏠 InstructBLIP  | 46.5 | 4    | 🏠 mPLUG-Owl-I   | 34.5 |
| 5    | 🏠 LLaVA         | 39.0 | 5    | 🏠 VideoChat2    | 23.0 | 5    | 🏠 LLaVA         | 45.0 | 5    | 🏠 LLaVA         | 34.0 |
| 6    | 🏠 VideoLLaMA    | 39.0 | 6    | 🏠 InstructBLIP  | 23.0 | 6    | 🏠 VideoLLaMA    | 43.0 | 6    | 🏠 VideoLLaMA    | 34.0 |
| 7    | 🏠 Otter-I       | 38.5 | 7    | 🏠 VideoLLaMA    | 22.5 | 7    | 🏠 mPLUG-Owl-I   | 34.5 | 7    | 🏠 MiniGPT-4     | 32.5 |
| 8    | 🏠 LLaMA-Adapter | 33.0 | 8    | 🏠 LLaMA-Adapter | 21.5 | 8    | 🏠 BLIP2         | 32.5 | 8    | 🏠 VideoChatGPT  | 30.5 |
| 9    | 🏠 VideoChatGPT  | 26.5 | 9    | 🏠 LLaVA         | 20.5 | 9    | 🏠 VideoChatGPT  | 31.0 | 9    | 🏠 LLaMA-Adapter | 29.0 |
| 10   | 🏠 mPLUG-Owl-I   | 23.5 | 10   | 🏠 VideoChatGPT  | 20.0 | 10   | 🏠 LLaMA-Adapter | 30.5 | 10   | 🏠 BLIP2         | 25.5 |
| 11   | 🏠 MiniGPT-4     | 16.0 | 11   | 🏠 MiniGPT-4     | 12.0 | 11   | 🏠 MiniGPT-4     | 9.5  | 11   | 🏠 Otter-I       | 20.0 |

(e) Unexpected Action

| Rank | Model           | Acc  |
|------|-----------------|------|------|-----------------|------|------|-----------------|------|------|-----------------|------|
| 1    | 🏠 VideoChat2    | 47.5 | 1    | 🏠 VideoChatGPT  | 48.5 | 1    | 🏠 VideoChat2    | 49.0 | 1    | 🏠 VideoChat2    | 58.5 |
| 2    | 🏠 LLaVA         | 39.5 | 2    | 🏠 LLaVA         | 47.0 | 2    | 🏠 VideoLLaMA    | 32.5 | 2    | 🏠 VideoChat     | 42.5 |
| 3    | 🏠 Otter-I       | 32.0 | 3    | 🏠 VideoChat     | 46.0 | 3    | 🏠 VideoChatGPT  | 29.0 | 3    | 🏠 LLaMA-Adapter | 41.5 |
| 4    | 🏠 BLIP2         | 29.0 | 4    | 🏠 VideoLLaMA    | 45.5 | 4    | 🏠 Otter-I       | 28.0 | 4    | 🏠 InstructBLIP  | 40.5 |
| 5    | 🏠 LLaMA-Adapter | 28.0 | 5    | 🏠 VideoChat2    | 44.0 | 5    | 🏠 BLIP2         | 27.0 | 5    | 🏠 BLIP2         | 40.0 |
| 6    | 🏠 VideoChat     | 26.5 | 6    | 🏠 BLIP2         | 42.0 | 6    | 🏠 VideoChat     | 26.5 | 6    | 🏠 VideoChatGPT  | 39.5 |
| 7    | 🏠 VideoChatGPT  | 26.0 | 7    | 🏠 mPLUG-Owl-I   | 40.0 | 7    | 🏠 MiniGPT-4     | 26.0 | 7    | 🏠 LLaVA         | 38.5 |
| 8    | 🏠 VideoLLaMA    | 25.5 | 8    | 🏠 LLaMA-Adapter | 39.5 | 8    | 🏠 InstructBLIP  | 25.5 | 8    | 🏠 VideoLLaMA    | 32.5 |
| 9    | 🏠 mPLUG-Owl-I   | 20.0 | 9    | 🏠 Otter-I       | 39.0 | 9    | 🏠 LLaMA-Adapter | 25.0 | 9    | 🏠 mPLUG-Owl-I   | 31.5 |
| 10   | 🏠 InstructBLIP  | 18.0 | 10   | 🏠 MiniGPT-4     | 34.0 | 10   | 🏠 LLaVA         | 25.0 | 10   | 🏠 Otter-I       | 28.5 |
| 11   | 🏠 InstructBLIP  | 16.5 | 11   | 🏠 InstructBLIP  | 32.0 | 11   | 🏠 mPLUG-Owl-I   | 24.0 | 11   | 🏠 MiniGPT-4     | 8.0  |

(f) Object Existence

| Rank | Model           | Acc  | Rank | Model          | Acc  | Rank | Model           | Acc  | Rank | Model           | Acc  |
|------|-----------------|------|------|----------------|------|------|-----------------|------|------|-----------------|------|
| 1    | 🏠 VideoChat2    | 83.5 | 1    | 🏠 VideoChat2   | 40.5 | 1    | 🏠 VideoChat2    | 40.5 | 1    | 🏠 VideoChat2    | 65.5 |
| 2    | 🏠 LLaVA         | 63.0 | 2    | 🏠 BLIP2        | 27.0 | 2    | 🏠 BLIP2         | 37.0 | 2    | 🏠 LLaVA         | 42.0 |
| 3    | 🏠 VideoChatGPT  | 62.0 | 3    | 🏠 VideoChat    | 26.0 | 3    | 🏠 InstructBLIP  | 30.5 | 3    | 🏠 InstructBLIP  | 38.0 |
| 4    | 🏠 VideoChat     | 56.0 | 4    | 🏠 VideoLLaMA   | 29.5 | 4    | 🏠 Otter-I       | 29.0 | 4    | 🏠 mPLUG-Owl-I   | 37.0 |
| 5    | 🏠 LLaMA-Adapter | 51.0 | 5    | 🏠 LLaVA        | 27.0 | 5    | 🏠 LLaMA-Adapter | 28.0 | 5    | 🏠 VideoLLaMA    | 37.0 |
| 6    | 🏠 VideoLLaMA    | 51.0 | 6    | 🏠 BLIP2        | 26.0 | 6    | 🏠 LLaVA         | 26.5 | 6    | 🏠 VideoLLaMA    | 37.0 |
| 7    | 🏠 InstructBLIP  | 46.0 | 7    | 🏠 mPLUG-Owl-I  | 25.5 | 7    | 🏠 VideoChatGPT  | 26.0 | 7    | 🏠 Otter-I       | 36.5 |
| 8    | 🏠 mPLUG-Owl-I   | 44.5 | 8    | 🏠 InstructBLIP | 25.5 | 8    | 🏠 VideoChat     | 23.5 | 8    | 🏠 VideoChat     | 36.0 |
| 9    | 🏠 Otter-I       | 39.5 | 9    | 🏠 VideoChat    | 23.5 | 9    | 🏠 VideoChatGPT  | 23.5 | 9    | 🏠 VideoChatGPT  | 35.5 |
| 10   | 🏠 mPLUG-Owl-I   | 33.5 | 10   | 🏠 VideoLLaMA   | 22.5 | 10   | 🏠 mPLUG-Owl-I   | 21.0 | 10   | 🏠 LLaMA-Adapter | 32.0 |
| 11   | 🏠 MiniGPT-4     | 26.0 | 11   | 🏠 MiniGPT-4    | 19.0 | 11   | 🏠 MiniGPT-4     | 9.9  | 11   | 🏠 BLIP2         | 31.0 |

(g) Object Interaction

| Rank | Model           | Acc  |
|------|-----------------|------|------|-----------------|------|------|-----------------|------|------|-----------------|------|
| 1    | 🏠 VideoChat2    | 49.5 | 1    | 🏠 VideoChat2    | 35.0 | 1    | 🏠 VideoChat2    | 40.5 | 1    | 🏠 VideoChat2    | 65.5 |
| 2    | 🏠 VideoChat     | 33.5 | 2    | 🏠 Otter-I       | 32.0 | 2    | 🏠 BLIP2         | 37.0 | 2    | 🏠 LLaVA         | 42.0 |
| 3    | 🏠 Otter-I       | 30.5 | 3    | 🏠 VideoLLaMA    | 30.0 | 3    | 🏠 InstructBLIP  | 30.5 | 3    | 🏠 InstructBLIP  | 38.0 |
| 4    | 🏠 LLaVA         | 30.5 | 4    | 🏠 VideoChatGPT  | 29.5 | 4    | 🏠 Otter-I       | 29.0 | 4    | 🏠 mPLUG-Owl-I   | 37.0 |
| 5    | 🏠 LLaMA-Adapter | 30.0 | 5    | 🏠 LLaVA         | 27.0 | 5    | 🏠 LLaMA-Adapter | 28.0 | 5    | 🏠 VideoLLaMA    | 37.0 |
| 6    | 🏠 VideoLLaMA    | 29.0 | 6    | 🏠 BLIP2         | 26.0 | 6    | 🏠 LLaVA         | 26.5 | 6    | 🏠 VideoLLaMA    | 37.0 |
| 7    | 🏠 mPLUG-Owl-I   | 27.0 | 7    | 🏠 mPLUG-Owl-I   | 25.5 | 7    | 🏠 VideoChatGPT  | 26.0 | 7    | 🏠 Otter-I       | 36.5 |
| 8    | 🏠 InstructBLIP  | 24.5 | 8    | 🏠 InstructBLIP  | 25.5 | 8    | 🏠 VideoChat     | 23.5 | 8    | 🏠 VideoChat     | 36.0 |
| 9    | 🏠 VideoChatGPT  | 22.5 | 9    | 🏠 VideoChat     | 23.5 | 9    | 🏠 VideoChatGPT  | 23.5 | 9    | 🏠 VideoChatGPT  | 35.5 |
| 10   | 🏠 MiniGPT-4     | 21.5 | 10   | 🏠 LLaMA-Adapter | 22.5 | 10   | 🏠 mPLUG-Owl-I   | 21.0 | 10   | 🏠 LLaMA-Adapter | 32.0 |
| 11   | 🏠 BLIP2         | 17.0 | 11   | 🏠 MiniGPT-4     | 19.0 | 11   | 🏠 MiniGPT-4     | 9.9  | 11   | 🏠 BLIP2         | 31.0 |

(h) Object Shuffle

| Rank | Model           | Acc  | Rank | Model          | Acc  | Rank | Model          | Acc  | Rank | Model           | Acc  |
|------|-----------------|------|------|----------------|------|------|----------------|------|------|-----------------|------|
| 1    | 🏠 VideoChat2    | 42.5 | 1    | 🏠 VideoChatGPT | 48.5 | 1    | 🏠 VideoChat2   | 49.0 | 1    | 🏠 VideoChat2    | 58.5 |
| 2    | 🏠 LLaVA         | 41.5 | 2    | 🏠 LLaVA        | 47.0 | 2    | 🏠 VideoLLaMA   | 32.5 | 2    | 🏠 VideoChat     | 42.5 |
| 3    | 🏠 VideoChatGPT  | 40.0 | 3    | 🏠 VideoChat    | 46.0 | 3    | 🏠 VideoChatGPT | 29.0 | 3    | 🏠 LLaMA-Adapter | 41.5 |
| 4    | 🏠 VideoLLaMA    | 38.0 | 4    | 🏠 VideoLLaMA   | 45.5 | 4    | 🏠 Otter-I      | 28.0 | 4    | 🏠 InstructBLIP  | 40.5 |
| 5    | 🏠 InstructBLIP  | 37.5 | 5    | 🏠 VideoChat2   | 44.0 | 5    | 🏠 BLIP2        | 27.0 | 5    | 🏠 BLIP2         | 40.0 |
| 6    | 🏠 mPLUG-Owl-I   | 34.0 | 6    | 🏠 BLIP2        | 42.0 | 6    | 🏠 VideoChat    | 26.5 | 6    | 🏠 VideoChatGPT  | 39.5 |
| 7    | 🏠 LLaMA-Adapter | 33.5 | 7    | 🏠 mPLUG-Owl-I  | 40.0 | 7    | 🏠 MiniGPT-4    | 26.0 | 7    | 🏠 LLaVA         | 38.5 |
| 8    | 🏠 BLIP2         | 31.0 |      |                |      |      |                |      |      |                 |      |

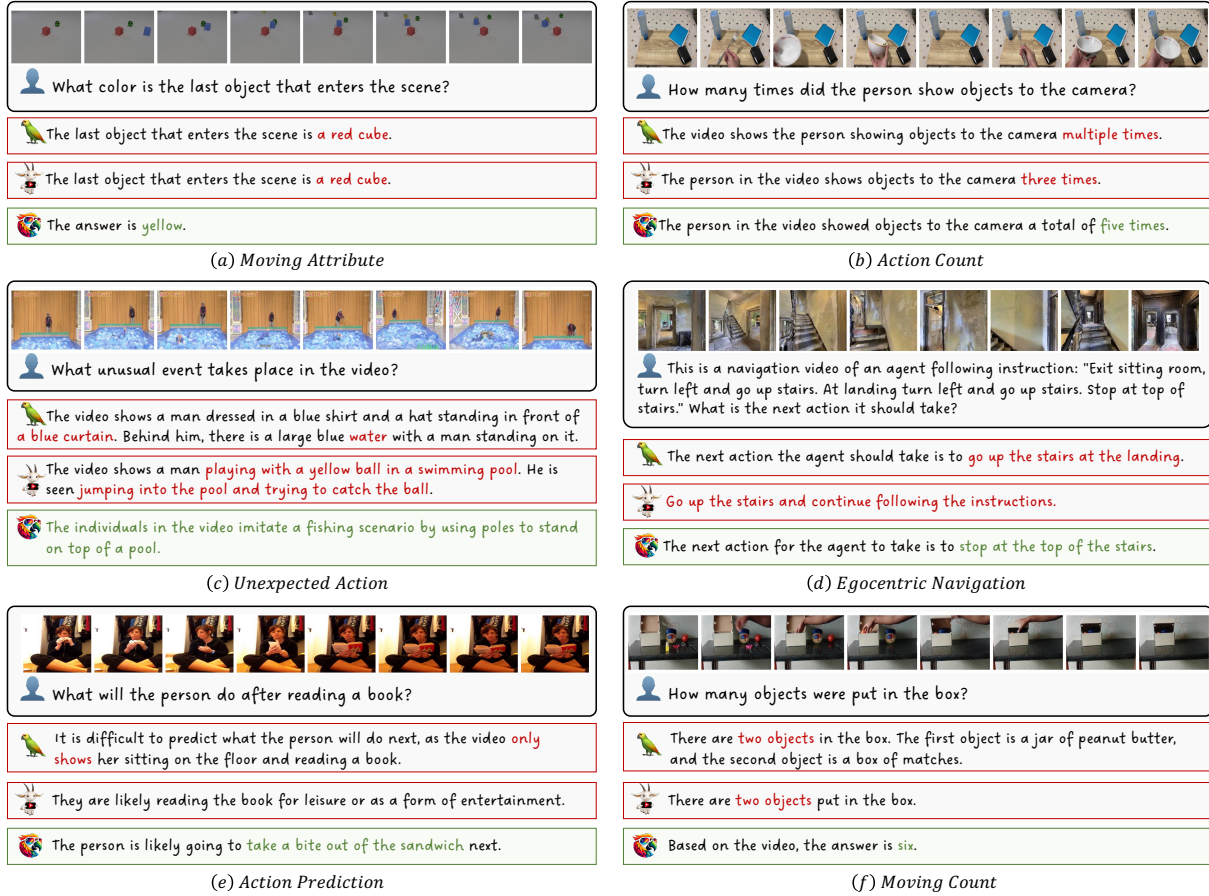

User  
 VideoChat  
 VideoChatGPT  
 VideoChat2

Figure 6. More qualitative comparisons in MVBench data. VideoChat2 handles different tasks well.

## G. Qualitative Results

Additional qualitative results can be found in Figs. 6 and 7. Compared with VideoChat [39] and VideoChatGPT [48], our VideoChat2 performs admirably across a range of tasks in MVBench. It possesses the capacity to accurately identify the properties of moving objects, recognize unforeseen actions, and predict future movements based on video context. Moreover, it exhibits robustness when dealing with both real and generated videos, adeptly providing detailed insights into human actions, camera motions, background ambiance, and character attributes.

|                                                                                                                                                                                                                                     |                                                                                                                                                                                                                                                                                                                                               |
|-------------------------------------------------------------------------------------------------------------------------------------------------------------------------------------------------------------------------------------|-----------------------------------------------------------------------------------------------------------------------------------------------------------------------------------------------------------------------------------------------------------------------------------------------------------------------------------------------|
|  <p>Describe the video.</p>                                                                                                                        |  <p>Describe the video in details.</p>                                                                                                                                                                                                                      |
| <p>A young girl wearing a pink jacket and jeans walking down the street. As she walks, the camera follows her, capturing her movements and the surroundings. The video ends with the girl walking away from the camera.</p>         | <p>The video shows a dragon playing a guitar. The dragon is shown in different angles and positions while playing the guitar. The video is of high quality and the dragon's movements are smooth and fluid.</p>                                                                                                                               |
|  <p>Describe the video.</p>                                                                                                                        |  <p>Describe the video in details.</p>                                                                                                                                                                                                                      |
| <p>In the video, a woman is shown wrapping a gift box using a roll of wrapping paper. She uses a pair of scissors to cut the paper and then wraps it around the gift box. The wrapping paper has a floral design on it.</p>         | <p>The video shows a robot with a futuristic design, standing in a forest. The robot has a metallic body and horns on its head. It appears to be a cyborg, with a mechanical appearance. The video is in slow motion, and the robot is shown in different angles. The forest setting adds a mysterious and eerie atmosphere to the video.</p> |
|  <p>Describe the video.</p>                                                                                                                      |  <p>Describe the video in details.</p>                                                                                                                                                                                                                    |
| <p>A black background with the words "puzzle dust circus" written on it. There is also a logo of the website "www.puzzledust.com" displayed on the screen. The video appears to be a promotional advertisement for the website.</p> | <p>The video shows a beautiful woman wearing a blue dress walking in a field surrounded by flowers. She is surrounded by butterflies and the sky is clear. The video is of high quality and has a serene atmosphere.</p>                                                                                                                      |

(a) YouTube Videos

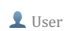

VideoChat2

(b) Genrated Videos

Figure 7. More descriptive examples. VideoChat2 can accurately describe the details of diverse videos.
